# Supplementary material for: Three-Dimensional Radiographic Outcome of Free-Handed Flaplessly Placed Mini Dental Implants in Edentulous Maxillae after 2-Years Function
Source: J Clin Med. 2020 Jul 5;9(7):2120. doi: 10.3390/jcm9072120 (PMC7408764; doi:10.3390/jcm9072120)
Supplement: Supplementary file 1 [file jcm-09-02120-s001.pdf]

## Supplementary Materials:

### Three-Dimensional Radiographic Outcome of Free-Handed Flaplessly Placed Mini Dental Implants in Edentulous Maxillae after 2-Years Function

344

R RUSTOGI

Table 6. Rhinosinusitis symptom severity score: RS-SSS

|               |                |
|---------------|----------------|
| Patient Name: | Date of Birth: |
| Date:         | File No:       |

**Please Score Your Symptoms**   0 (none)   1 (mild)   2 (moderate)   3 (severe)

|                                |
|--------------------------------|
| 1. Nasal Congestion (blockage) |
| 2. Clear Nasal Discharge       |
| 3. Discoloured Nasal Discharge |
| 4. Facial Pain                 |
| 5. Sinus Headache              |
| 6. Upper Jaw Toothache         |
| 7. Disturbed Smelling          |
| 8. Cave-like Speech            |
| 9. Sore Throat                 |
| 10. Fever (more than 37.8°C)   |
| 11. Foul Breath                |
| 12. Swelling Around Eyes       |
| 13. Cough                      |
| 14. Wheezy Chest               |
| 15. Tiredness                  |

(1–6: major symptoms, 7–15: minor symptoms)

**Symptom Key:** 0 – no symptom, 1 (mild) – some discomfort, 2 (moderate) – discomfort which sometimes interferes with daily activities and sleep, 3 (severe) – discomfort, regularly preventing participation in work, school and other activities.

#### Office Use

**Scoring:** To qualify a patient must have at least one major symptom

|                                    |  |                                                                     |
|------------------------------------|--|---------------------------------------------------------------------|
| Score of 1                         |  | Key :<br><br>1–3.66: Mild<br>4–8.66 : Moderate<br>9 or more: Severe |
| Highest Score of 2 or 3            |  |                                                                     |
| Highest Score of 4, 5 or 6         |  |                                                                     |
| Highest Score of 7–15 divided by 3 |  |                                                                     |
| Total                              |  |                                                                     |

**Global Clinical Assessment:** ☐ None   ☐ Mild   ☐ Moderate   ☐ Severe
